# Supplementary material for: BCAS2 is involved in alternative mRNA splicing in spermatogonia and the transition to meiosis
Source: PubMed Central journal article supplement (PMC5290162; doi:10.1038/ncomms14182), 2017-01-27
Supplement: ncomms14182-s1.pdf [file ncomms14182-s1.pdf]

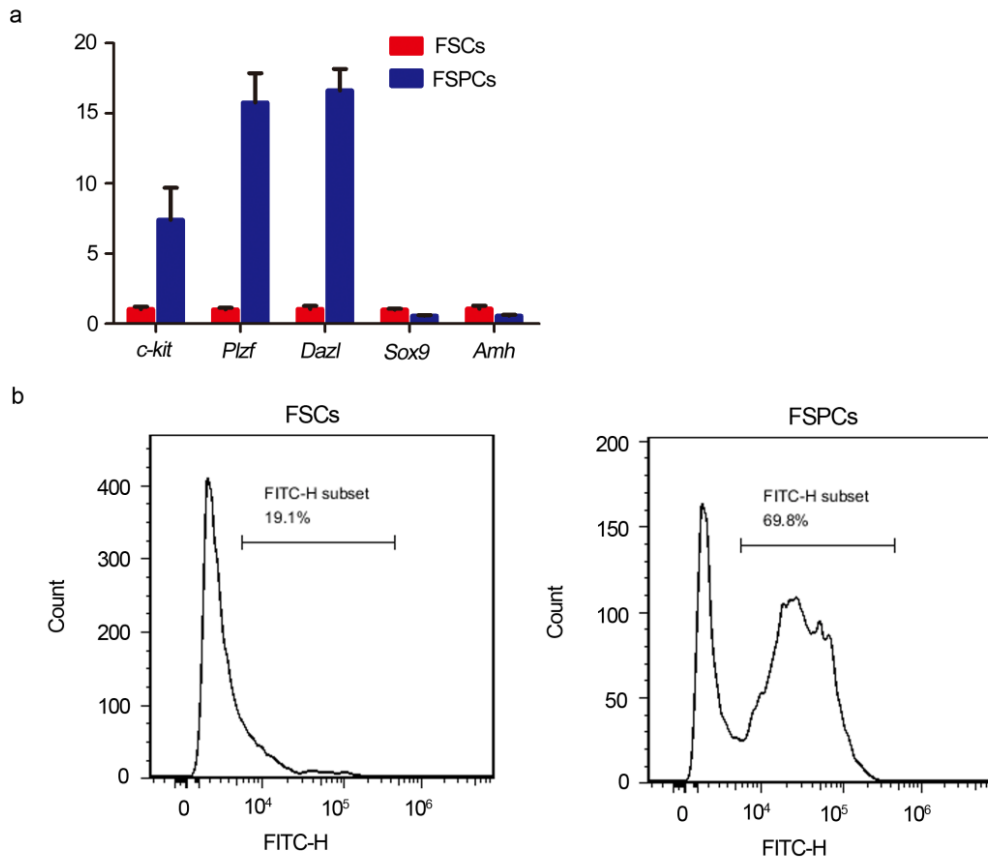

**Supplementary Fig 1. Analysis the enrichment of spermatogenic cells and somatic cells.** (a) Real-time RT-RPCR analyzed the expression of markers in the fraction of spermatogenic cells (FSPCs) and the fraction of somatic cells (FSCs) enriched from the testes of P9 mice with *Gapdh* as internal control. *Plzf*, *c-Kit* and *Dazl* were used as the germ cells markers, meanwhile, *Sox9* and *Amh* were used as the somatic cells markers. Error bars represent s.e.m. (b) Flow cytometry analysis the ratio of MVH positive cells in FSPCs and FSCs enriched from P9 testes.

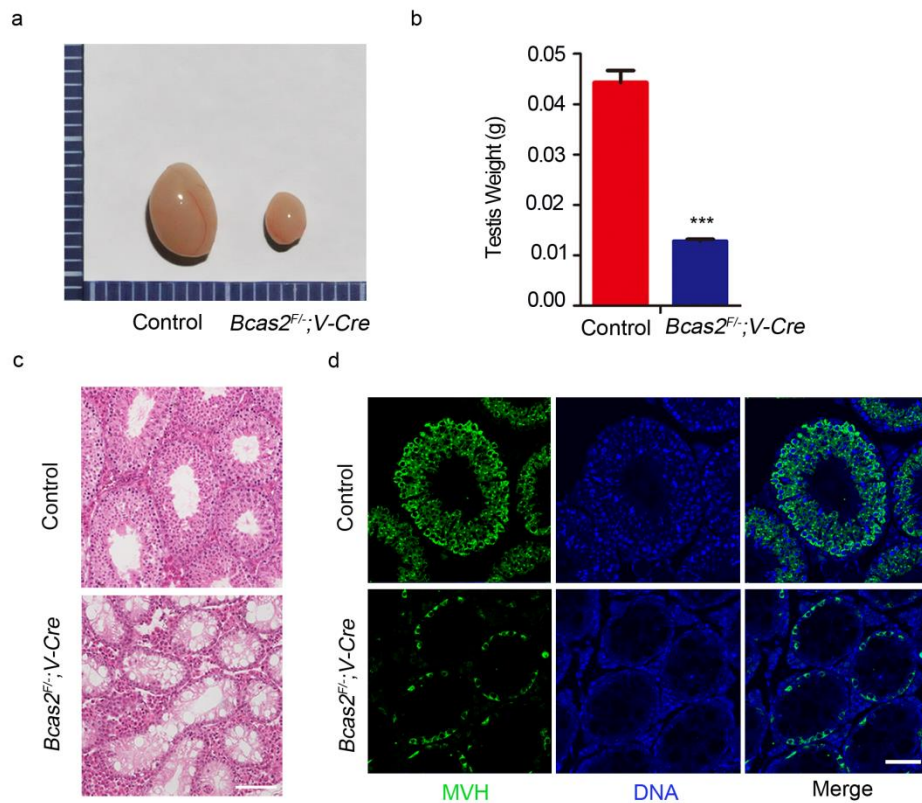

**Supplementary Fig 2. BCAS2 is required for spermatogenesis in one-month-old testes.** (a) Morphological analysis of one-month-old testes showed that the *Bcas2<sup>F/f</sup>;Vasa-Cre* testes were smaller than the control. (b) Testes weight of one-month-old control and *Bcas2<sup>F/f</sup>;Vasa-Cre* mice (\*\*\*)  $P < 0.001$ ,  $n = 5$ ). Error bars represent s.e.m. (c) Hematoxylin and eosin (H&E) staining of control and *Bcas2<sup>F/f</sup>;Vasa-Cre* testes in one-month-old mice. Spermatocytes and spermatids were almost absent in the seminiferous tubules of the *Bcas2<sup>F/f</sup>;Vasa-Cre* mice. Scale bar, 100  $\mu\text{m}$ . (d) IF staining of MVH (a germ cell marker) in control and *Bcas2<sup>F/f</sup>;Vasa-Cre* one-month-old mice. Compared to the control, only a few MVH positive cells in the basement membrane were observed in *Bcas2<sup>F/f</sup>;Vasa-Cre* testes. The DNA was stained with Hoechst 33342. Scale bar, 50  $\mu\text{m}$ .

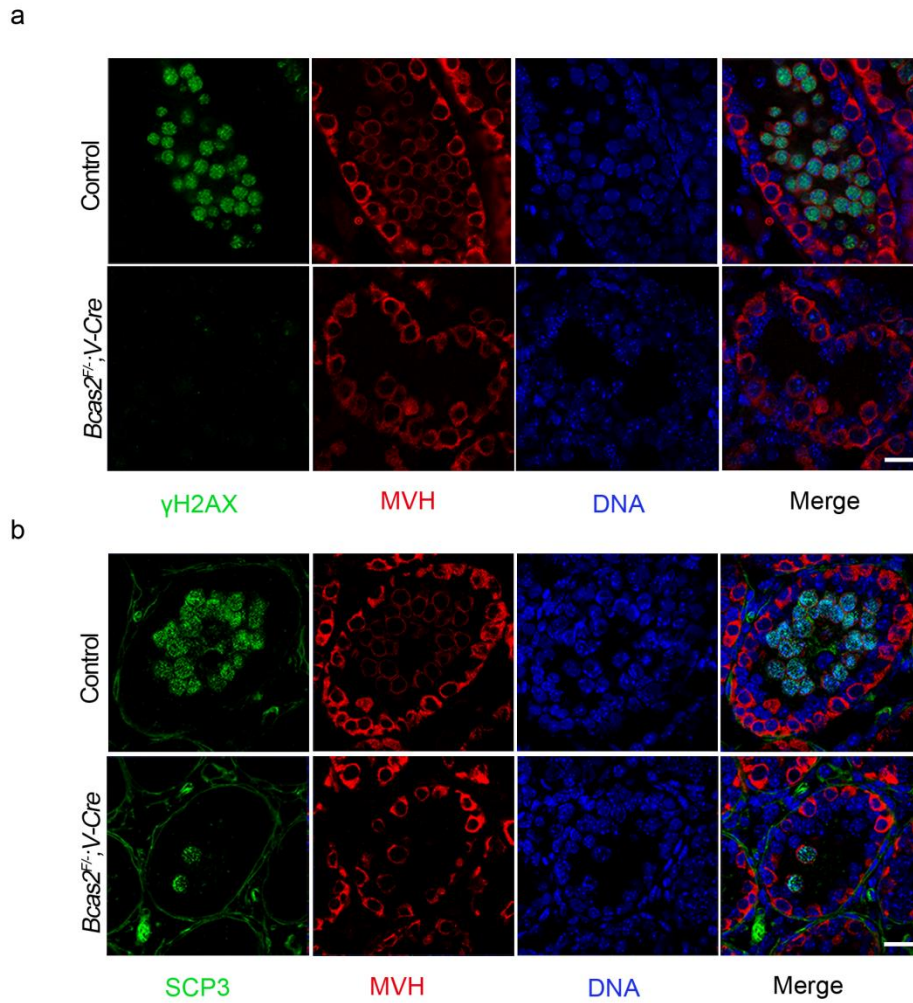

**Supplementary Fig 3. Deficiency of meiosis event in prophase I of *Bcas2<sup>F/f</sup>;Vasa-Cre* testes.** (a) IF staining for SCP3 of control and *Bcas2<sup>F/f</sup>;Vasa-Cre* testes at P12. MVH was used as a germ cell indicator. The DNA was stained with Hoechst 33342. Scale bar, 20  $\mu$ m. (b) IF staining for  $\gamma$ H2AX in control and *Bcas2<sup>F/f</sup>;Vasa-Cre* testes at P12. MVH was used as a germ cell indicator. The DNA was stained with Hoechst 33342. Scale bar, 20  $\mu$ m.

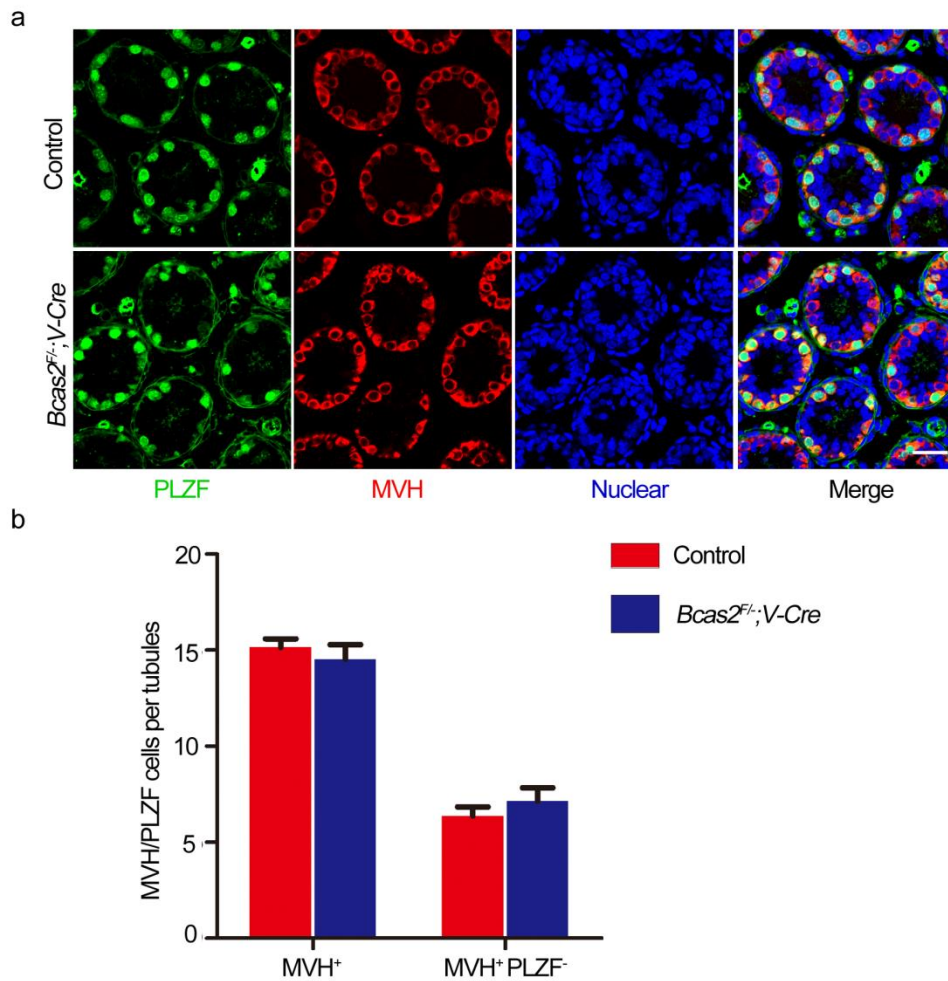

**Supplementary Fig 4. Analysis of development stages of spermatogonia in *Bcas2<sup>F/-</sup>;Vasa-Cre* testes.** (a) Double staining of PLZF (Green) and MVH (Red) in sections of control and *Bcas2<sup>F/-</sup>;Vasa-Cre* testes at P10. Scale bar, 25  $\mu$ m. (b) The number (mean $\pm$ s.e.m.) of MVH<sup>+</sup> and PLZF<sup>-</sup>MVH<sup>+</sup> cells per seminiferous tubules cross-section in control and *Bcas2<sup>F/-</sup>;Vasa-Cre* testes at P10. At least 200 tubules were counted from 3 independent mice. Error bars represent s.e.m.

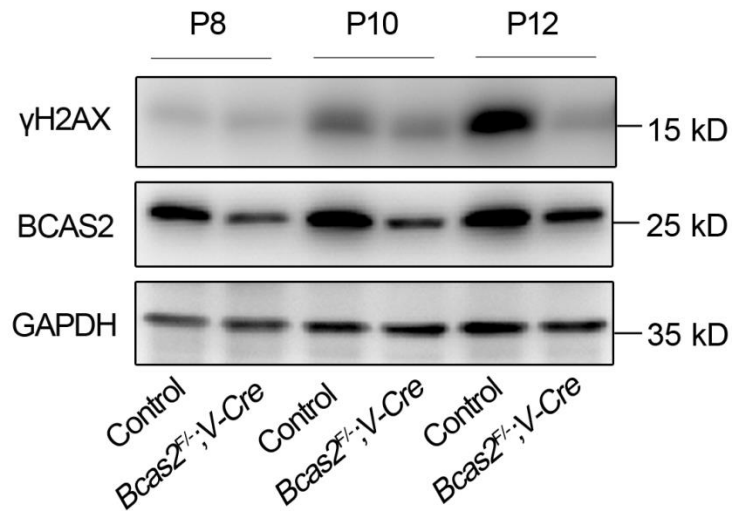

**Supplementary Fig 5. DNA damage signals do not accumulate in *Bcas2<sup>F/-</sup>;Vasa-Cre* testes during the transition of mitosis to meiosis.** Western analysis the expression of  $\gamma$ H2AX which is marker of double-stranded DNA damage (DSB) in DNA damage in control and *Bcas2<sup>F/-</sup>;Vasa-Cre* testes at P8, P10 and P12. The level of BCAS2 protein showed the samples of control and *Bcas2<sup>F/-</sup>;Vasa-Cre* mice. GAPDH was used as loading control.

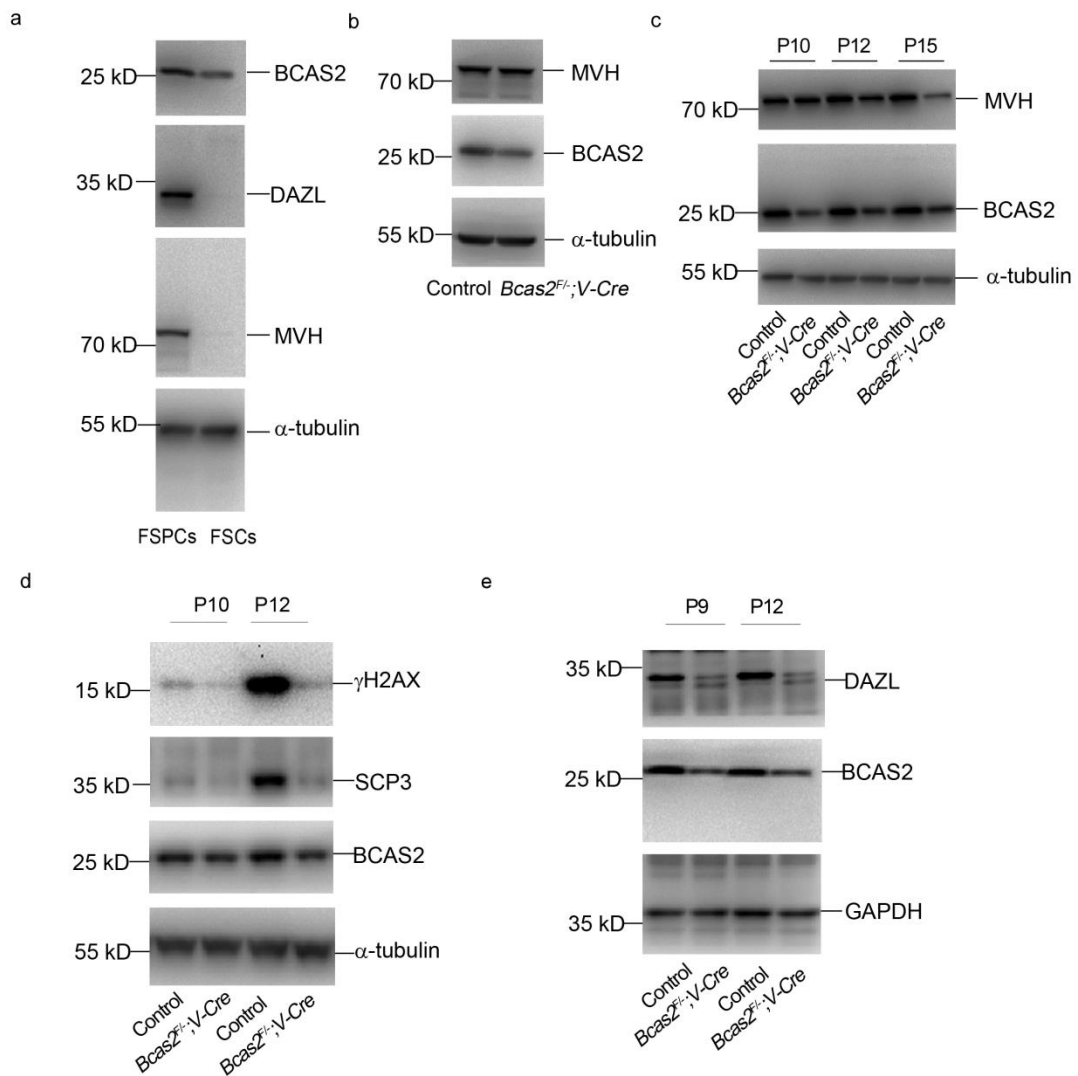

**Supplementary Fig 6. Original gels shown in the main manuscript.** (a) Blots correspond to shown in Figure 1d. (b) Blots correspond to shown in Figure 2b. (c) Blots correspond to shown in Figure 3a. (d) Blots correspond to shown in Figure 3c. (e) Blots correspond to shown in Figure 6d.

**Supplementary Table 1. Summary of RNA-seq data mapping results**

| Sample name     | Control           | <i>Bcas2<sup>F/-</sup>;V-Cre</i> |
|-----------------|-------------------|----------------------------------|
| Total reads     | 51803114          | 51446816                         |
| Clean reads     | 50610844 (100%)   | 49955178 (100%)                  |
| Total mapped    | 46333767 (91.55%) | 45740076 (91.56%)                |
| Multiple mapped | 1170662 (2.31%)   | 1119594 (2.24%)                  |
| Uniquely mapped | 45163105 (89.24%) | 44620482 (89.32%)                |

**Supplementary Table 2. A list of 7 significantly changed transcriptions**

| Gene ID            | Gene Symbol | RPKM-Control | RPKM- <i>Bcas2<sup>F/-</sup>;V-cre</i> | Fold Change | P-value     |
|--------------------|-------------|--------------|----------------------------------------|-------------|-------------|
| ENSMUSG00000003545 | FosB        | 10.92146     | 0.2758                                 | 39.59750    | 0.001992536 |
| ENSMUSG00000006574 | Slc4a1      | 15.68347     | 0.60653                                | 25.85761    | 7.55E-05    |
| ENSMUSG00000056054 | S100a8      | 9.34920      | 0.659802                               | 14.16969    | 0.003811089 |
| ENSMUSG00000056071 | S100a9      | 9.82674      | 0.400996                               | 24.5058     | 0.003811089 |
| ENSMUSG00000080893 | Gm15920     | 24.3526      | 7.720678                               | 3.154213    | 0.002910623 |
| ENSMUSG00000081824 | BC002163    | 39.33253     | 13.71876                               | 2.86706     | 0.000396505 |
| ENSMUSG00000095597 | Gm6472      | 29.10597     | 9.837943                               | 2.95854     | 0.001501834 |

Fold Change: RPKM-Control/ RPKM-*Bcas2<sup>F/-</sup>;V-Cre*.

Fold Change>2 as the threshold for significantly differential expression

*P-value*: Corrected P-value <0.005 as the threshold for significantly differential expression

on



### Supplementary Table 3. A list of significantly changed transcriptions in P9 testes

Down-regulated in *Bcas2<sup>F/-</sup>;V-cre* sample

| GeneNames           | Gene Symbol | RPKM-control | RPKM- <i>Bcas2<sup>F/-</sup>;V-cre</i> | FC-normalized | p-value     |
|---------------------|-------------|--------------|----------------------------------------|---------------|-------------|
| ENSMUSG00000060636  | RpL35A      | 711.99       | 472.22                                 | 0.66          | 3.35E-11    |
| ENSMUSG00000067702  | Tuba3a      | 237.21       | 131.77                                 | 0.56          | 8.22E-08    |
| ENSMUSG00000036752  | Tubb4b      | 431.96       | 282.78                                 | 0.65          | 9.74E-08    |
| ENSMUSG00000006574  | SLC4A1      | 15.68        | 0.61                                   | 0.04          | 7.55E-05    |
| ENSMUSG00000081824  | BC002163    | 39.33        | 13.72                                  | 0.35          | 0.000396505 |
| ENSMUSG00000067338  | Tuba3b      | 136.44       | 83.09                                  | 0.61          | 0.000587107 |
| ENSMUSG00000028393  | Alad        | 146.90       | 91.69                                  | 0.62          | 0.000620042 |
| ENSMUSG00000057933  | gstA2       | 89.59        | 50.67                                  | 0.57          | 0.001421674 |
| ENSMUSG00000095597  | Gm6472      | 29.11        | 9.84                                   | 0.34          | 0.001501834 |
| ENSMUSG00000031431  | TSC22D3     | 97.82        | 57.12                                  | 0.58          | 0.001943679 |
| ENSMUSG00000003545  | fosB        | 10.92        | 0.28                                   | 0.03          | 0.001992536 |
| ENSMUSG00000080893  | Gm15920     | 24.35        | 7.72                                   | 0.32          | 0.002910623 |
| ENSMUSG00000056071  | S100A9      | 9.83         | 0.40                                   | 0.04          | 0.003811089 |
| ENSMUSG00000056054  | S100A8      | 9.35         | 0.66                                   | 0.07          | 0.003811089 |
| ENSMUSG00000094777  | Hist1h2ap   | 91.41        | 56.51                                  | 0.62          | 0.005752131 |
| ENSMUSG00000061232  | H2-K1       | 59.02        | 32.29                                  | 0.55          | 0.006407903 |
| ENSMUSG00000042462  | DCTPP1      | 84.96        | 51.58                                  | 0.61          | 0.006546874 |
| ENSMUSG00000073940  | Hbb-bt      | 42.42        | 20.31                                  | 0.48          | 0.00692075  |
| ENSMUSG00000029848  | STRA8       | 87.25        | 56.82                                  | 0.65          | 0.013635895 |
| ENSMUSG00000065037  | Rn7sk       | 20.02        | 7.97                                   | 0.40          | 0.01613516  |
| ENSMUSG000000032291 | CRABP1      | 76.06        | 48.05                                  | 0.63          | 0.016609513 |
| ENSMUSG00000073411  | H2-D1       | 59.31        | 35.48                                  | 0.60          | 0.017935705 |
| ENSMUSG00000022652  | MORC1       | 16.81        | 5.97                                   | 0.36          | 0.021711344 |
| ENSMUSG00000005470  | ASF1B       | 50.15        | 29.63                                  | 0.59          | 0.023886394 |
| ENSMUSG00000022432  | SMC1B       | 25.64        | 11.30                                  | 0.44          | 0.025196064 |
| ENSMUSG00000030041  | D6Mm5e      | 29.26        | 14.78                                  | 0.51          | 0.028344916 |
| ENSMUSG00000020766  | Galk1       | 53.81        | 32.27                                  | 0.60          | 0.029888826 |
| ENSMUSG00000009670  | Tex11       | 33.19        | 17.97                                  | 0.54          | 0.030252176 |
| ENSMUSG00000015365  | Mov10l1     | 64.02        | 41.85                                  | 0.65          | 0.033078693 |
| ENSMUSG00000040152  | Thbs1       | 15.75        | 5.29                                   | 0.34          | 0.033452824 |
| ENSMUSG00000070348  | CCND1       | 25.78        | 12.78                                  | 0.50          | 0.041242165 |
| ENSMUSG00000023443  | ESX1        | 11.19        | 3.35                                   | 0.30          | 0.044683493 |
| ENSMUSG00000093599  | Mir5620     | 5.38         | 0.92                                   | 0.17          | 0.049303386 |
| ENSMUSG00000085666  | Gm9855      | 13.89        | 0.00                                   | NA            | 1.22E-05    |
| ENSMUSG00000059040  | eno1        | 6.29         | 0.00                                   | NA            | 0.001980656 |
| ENSMUSG00000098453  | Mir6997     | 3.54         | 0.00                                   | NA            | 0.019378059 |
| ENSMUSG00000093404  | Gm25190     | 2.11         | 0.00                                   | NA            | 0.042875493 |
| ENSMUSG00000080384  | Gm22105     | 2.16         | 0.00                                   | NA            | 0.042875493 |
| ENSMUSG00000027073  | PRG2        | 2.22         | 0.00                                   | NA            | 0.042875493 |

Up-regulated in *Bcas2<sup>F/+</sup>;V-cre* sample

| GeneNames           |          | RPKM-control | RPKM- <i>Bcas2<sup>F/+</sup>;V-cre</i> | FC-normalized | p-value     |
|---------------------|----------|--------------|----------------------------------------|---------------|-------------|
| ENSMUSG00000085354  | Gm2044   | 160.64       | 260.18                                 | 1.62          | 3.55E-07    |
| ENSMUSG00000003555  | CYP17A1  | 94.79        | 152.09                                 | 1.60          | 0.000116227 |
| ENSMUSG000000065126 | Snord104 | 64.55        | 101.98                                 | 1.58          | 0.002687811 |
| ENSMUSG000000029304 | SPP1     | 54.31        | 84.33                                  | 1.55          | 0.007791217 |
| ENSMUSG000000067608 | Pcna-ps2 | 0.08         | 6.79                                   | 85.01         | 0.02284126  |
| ENSMUSG000000034674 | TDG      | 40.75        | 62.35                                  | 1.53          | 0.023503576 |
| ENSMUSG000000088929 | Gm24299  | 28.99        | 47.36                                  | 1.63          | 0.023688103 |
| ENSMUSG000000077565 | Gm23201  | 5.64         | 15.69                                  | 2.78          | 0.026625954 |
| ENSMUSG000000093124 | Gm24366  | 0.58         | 5.41                                   | 9.27          | 0.043878831 |
| ENSMUSG000000064542 | Gm22980  | 1.43         | 7.39                                   | 5.15          | 0.046219061 |
| ENSMUSG000000064390 | Rnu73b   | 0.00         | 4.37                                   | NA            | 0.008015242 |
| ENSMUSG000000098363 | Mir6993  | 0.00         | 3.18                                   | NA            | 0.017715641 |
| ENSMUSG000000089265 | Gm22888  | 0.00         | 3.36                                   | NA            | 0.017715641 |
| ENSMUSG000000098479 | Gm27263  | 0.00         | 2.04                                   | NA            | 0.039996352 |
| ENSMUSG000000065439 | Mir140   | 0.00         | 2.22                                   | NA            | 0.039996352 |
| ENSMUSG000000093119 | Gm25640  | 0.00         | 2.07                                   | NA            | 0.039996352 |
| ENSMUSG000000099107 | Gm27898  | 0.00         | 2.59                                   | NA            | 0.039996352 |
| ENSMUSG000000092953 | Gm26217  | 0.00         | 2.46                                   | NA            | 0.039996352 |
| ENSMUSG000000094650 | Gm25361  | 0.00         | 2.04                                   | NA            | 0.039996352 |
| ENSMUSG000000064770 | n-R5s29  | 0.00         | 2.61                                   | NA            | 0.039996352 |

**FC (Fold Change):** RPKM-*Bcas2<sup>F/+</sup>;V-Cre* / RPKM-Control.

**FC**>1.5 as the threshold for significantly differential expression

**P-value:** Corrected P-value <0.05 as the threshold for significantly differential expression

**Supplementary Table 4. A list of changed alternative splicing events**

| AccID         | Location               | Exon_<br>Number | Control_Skip<br>::Others | Bcas2F/-;V-Cre<br>_Skip::Others | CExp     | FVExp    | Adjusted_<br>PValue | SplicingType       |
|---------------|------------------------|-----------------|--------------------------|---------------------------------|----------|----------|---------------------|--------------------|
| 2610005L07Rik | 8:20401377-20401496    | 9               | 107::490                 | 421::374                        | 49::27   | 13::56   | 1.55E-08            | cassette           |
| Gm21811       | 8:20401377-20401496    | 8               | 10::490                  | 327::374                        | 49::24   | 13::45   | 1.84E-07            | cassette           |
| 2610005L07Rik | 8:20278090-20278170    | 17              | 47::132                  | 130::102                        | 57::27   | 21::56   | 2.33E-07            | altend             |
| 2610005L07Rik | 8:20271922-20272002    | 21              | 15::0                    | 22::98                          | 5::27    | 76::56   | 1.42E-05            | altend             |
| Casp2         | 6:42276870-42276930    | 9               | 98::6                    | 79::43                          | 2::107   | 17::98   | 1.72E-04            | cassette           |
| Dym           | 18:75126664-75126744   | 15              | 95::0                    | 119::20                         | 1::83    | 19::67   | 2.29E-04            | altstart           |
| 2610005L07Rik | 8:20405121-20405195    | 8               | 255::0                   | 188::302                        | 71::105  | 14::71   | 3.02E-04            | alt5               |
| Magea5        | x:155055395-155055483  | 5               | 0::82                    | 6::10                           | 35::19   | 7::16    | 0.001853            | cassette           |
| Smpd4         | 16:17620586-17620630   | 3               | 78::1                    | 76::25                          | 1::77    | 10::73   | 0.001944            | cassette           |
| Ints10        | 8:68824190-68824267    | 17              | 173::111                 | 141::14                         | 59::82   | 17::58   | 0.002032            | cassette           |
| Fam135a       | 1:24042949-24043024    | 14              | 47::1                    | 52::22                          | 1::74    | 12::78   | 0.00221             | cassette           |
| Adck5         | 15:76604626-76604671   | 51              | 108::0                   | 82::12                          | 4::109   | 13::87   | 0.002313            | cassette           |
| E2f5          | 3:14581136-14581206    | 2               | 62::16                   | 41::50                          | 7::100   | 22::95   | 0.002344            | cassette           |
| Wbp1l         | 19:46606712-46606759   | 2               | 50::103                  | 37::205                         | 36::130  | 83::140  | 0.002404            | cassette           |
| Gm10256       | y:2832910-2833060      | 3               | 360::134                 | 235::144                        | 74::13   | 72::1    | 0.002712            | cassette           |
| Dazl          | 17:50284996-50285046   | 8               | 103::1622                | 260::403                        | 574::771 | 202::560 | 0.002863            | cassette           |
| Gm17606       | 14:54649522-54649532   | 14              | 15::113                  | 2::127                          | 47::70   | 132::85  | 0.00306             | alt3               |
| Acin1         | 14:54649522-54649532   | 20              | 15::113                  | 2::127                          | 47::70   | 132::85  | 0.00306             | alt5               |
| Gls           | 1:52200618-52200651    | 10              | 339::20                  | 208::36                         | 52::73   | 79::58   | 0.003205            | cassette_multi     |
| Ppm1b         | 17:85023032-85023079   | 9               | 20::79                   | 18::18                          | 35::164  | 11::170  | 0.003226            | cassette           |
| Gm21811       | 8:20405121-20405195    | 10              | 255::0                   | 188::302                        | 71::86   | 14::43   | 0.003357            | alt3               |
| Srbd1         | 17:85997506-85997547   | 20              | 45::6                    | 40::27                          | 3::52    | 11::40   | 0.003815            | cassette           |
| Cpsf1         | 15:76604626-76604671   | 2               | 108::0                   | 82::12                          | 4::116   | 13::90   | 0.003858            | cassette           |
| Gm27029       | 11:101416849-101416925 | 10              | 92::6                    | 88::22                          | 3::100   | 15::83   | 0.004002            | cassette           |
| 1810058I24Rik | 6:35252956-35253045    | 2               | 505::52                  | 516::119                        | 46::165  | 94::159  | 0.004259            | cassette           |
| Aarsd1        | 11:101416849-101416925 | 3               | 92::6                    | 88::22                          | 3::113   | 15::92   | 0.004417            | cassette           |
| Gnaz          | 10:74972197-74972243   | 2               | 24::0                    | 16::18                          | 1::20    | 8::16    | 0.00454             | cassette           |
| Trrap         | 5:144810151-144810204  | 34              | 109::6                   | 124::41                         | 6::116   | 19::120  | 0.005066            | cassette_multi     |
| Smpd4         | 16:17620712-17620762   | 4               | 76::9                    | 76::34                          | 4::77    | 14::73   | 0.005068            | cassette_multi     |
| Ska1          | 18:74207530-74207594   | 1               | 9::45                    | 20::20                          | 7::30    | 16::16   | 0.005269            | alt5               |
| Lnp           | 2:74534615-74534668    | 13              | 23::21                   | 23::1                           | 9::31    | 1::32    | 0.005345            | cassette           |
| Tbc1d1        | 5:64284690-64284809    | 15              | 41::1                    | 37::18                          | 2::42    | 12::39   | 0.005408            | cassette_multi     |
| Hk1           | 10:62291975-62292043   | 19              | 67::4                    | 60::29                          | 2::70    | 12::76   | 0.005424            | cassette           |
| 2310045N01Rik | 8:70159386-70159454    | 4               | 36::2                    | 22::19                          | 2::32    | 9::24    | 0.00583             | cassette           |
| Ddi2          | 4:141689270-141689331  | 11              | 32::93                   | 11::198                         | 38::42   | 78::45   | 0.006111            | cassette           |
| Ptbp2         | 3:119760651-119760731  | 4               | 84::9                    | 95::38                          | 11::128  | 27::121  | 0.00617             | altend             |
| Rdh13         | 7:4443737-4443771      | 4               | 43::1                    | 35::29                          | 2::27    | 10::25   | 0.006253            | cassette           |
| Rgs3          | 4:62626492-62626531    | 16              | 5::7                     | 31::5                           | 3::28    | 15::30   | 0.006305            | mutually_exclusive |
| Rsc1a1        | 4:141689270-141689331  | 11              | 32::93                   | 11::198                         | 38::73   | 78::81   | 0.006318            | cassette           |
| Esp1          | 4:11338722-11338831    | 17              | 60::43                   | 32::65                          | 17::70   | 32::58   | 0.00635             | cassette           |

|               |                        |    |            |           |                |           |          |                    |
|---------------|------------------------|----|------------|-----------|----------------|-----------|----------|--------------------|
| Mef2b         | 8:70159386-70159454    | 3  | 36::2      | 21::19    | 2::29          | 9::22     | 0.006398 | cassette           |
| Eif2b3        | 4:117070942-117071022  | 13 | 240::11    | 176::24   | 11::155        | 23::106   | 0.006876 | altend             |
| Rgs3          | 4:62626492-62626531    | 6  | 5::7       | 31::5     | 3::47          | 15::55    | 0.006926 | mutually_exclusive |
| Copz2         | 11:96852111-96852154   | 3  | 110::75    | 116::25   | 25::138        | 8::119    | 0.006961 | cassette           |
| Polr3h        | 15:81917474-81917594   | 5  | 167::6     | 149::18   | 3::80          | 19::68    | 0.007533 | cassette           |
| Ascc1         | 10:60002418-60002467   | 5  | 197::60    | 190::102  | 35::120        | 58::100   | 0.007541 | cassette_multi     |
| Rplp0         | 5:115561099-115561245  | 4  | 5510::1563 | 2694::153 | 2146::371<br>0 | 723::2594 | 0.008056 | unknown            |
| 6720401G13Rik | x:50606076-50606162    | 7  | 12::33     | 31::16    | 21::57         | 10::68    | 0.008311 | unknown            |
| Cinp          | 12:110878988-110879039 | 4  | 111::12    | 94::29    | 25::90         | 43::77    | 0.008448 | cassette           |
| Atf2          | 2:73870623-73870685    | 4  | 139::34    | 134::92   | 13::95         | 33::106   | 0.008786 | cassette           |
| Smim14        | 5:65485054-65485127    | 3  | 269::32    | 280::8    | 14::55         | 5::62     | 0.00899  | cassette           |
| Zfp518a       | 19:40894705-40894790   | 2  | 19::5      | 15::23    | 3::107         | 11::93    | 0.009223 | altstart           |
| Il15ra        | 2:11727763-11727833    | 7  | 9::1       | 18::27    | 1::25          | 9::19     | 0.009236 | cassette           |
| Trim34b       | 7:104353194-104353274  | 10 | 39::17     | 29::37    | 12::38         | 38::48    | 0.009293 | altend             |
| E130114P18Rik | 4:97584548-97584607    | 5  | 0::58      | 11::29    | 37::30         | 26::44    | 0.009611 | altstart           |
| Gif2a1        | 12:91585375-91585478   | 4  | 103::5     | 78::18    | 2::83          | 10::76    | 0.009629 | cassette           |
| Ccdc152       | 15:3293853-3293921     | 4  | 7::35      | 0::89     | 16::19         | 42::21    | 0.009846 | cassette_multi     |
| Ap4m1         | 5:138172437-138172787  | 3  | 107::21    | 59::48    | 9::88          | 21::71    | 0.010073 | retain_intron      |
| Mitd1         | 1:37879997-37880088    | 6  | 101::2     | 62::14    | 3::41          | 12::39    | 0.010239 | cassette           |
| Fam105a       | 15:27680404-27680434   | 2  | 33::0      | 43::14    | 3::27          | 12::25    | 0.010256 | cassette           |
| Rfc4          | 16:23114107-23114187   | 11 | 151::14    | 76::54    | 21::131        | 35::91    | 0.010351 | retain_intron      |
| Tsc22d3       | x:140542511-140542846  | 2  | 28::28     | 83::23    | 5::21          | 15::13    | 0.010525 | alt5               |
| Bnip1         | 17:26783244-26783332   | 3  | 117::1     | 150::18   | 9::75          | 23::77    | 0.010653 | cassette           |
| Armc9         | 1:86218848-86218898    | 21 | 103::0     | 55::11    | 1::24          | 6::19     | 0.010841 | cassette           |
| Hspb11        | 4:107254918-107255020  | 4  | 133::4     | 116::14   | 2::74          | 15::73    | 0.01152  | cassette           |
| Tial1         | 7:128458597-128458656  | 3  | 173::55    | 131::139  | 27::80         | 57::97    | 0.01162  | cassette           |
| Zcchc2        | 1:106006015-106006086  | 4  | 7::15      | 1::47     | 6::21          | 19::22    | 0.012305 | cassette           |
| Mecr          | 4:131861177-131861232  | 6  | 103::17    | 95::43    | 11::68         | 22::63    | 0.012346 | cassette           |
| Socs5         | 17:87120748-87120808   | 2  | 13::1      | 10::14    | 3::42          | 12::43    | 0.012392 | cassette_multi     |
| Myh14         | 7:44657417-44657440    | 6  | 5::3       | 1::22     | 1::10          | 8::10     | 0.012469 | cassette           |
| Chd11         | 3:97580979-97581003    | 15 | 5::96      | 19::67    | 9::111         | 19::86    | 0.012609 | alt5               |
| Gm527         | 12:64922682-64922768   | 5  | 63::11     | 33::22    | 8::53          | 17::43    | 0.01272  | cassette           |
| Golga4        | 9:118579542-118579606  | 26 | 104::58    | 104::17   | 38::63         | 21::64    | 0.012838 | cassette           |
| Palm          | 10:79816792-79816923   | 8  | 105::77    | 70::97    | 29::94         | 47::77    | 0.012846 | cassette           |
| Myo9b         | 8:71336876-71336965    | 15 | 9::83      | 14::37    | 39::35         | 16::33    | 0.013066 | cassette           |
| Gm20431       | 2:167629069-167629288  | 8  | 319::20    | 308::78   | 10::124        | 27::123   | 0.013115 | cassette           |
| Prrg1         | x:78506914-78506979    | 4  | 29::0      | 32::17    | 1::42          | 8::46     | 0.013238 | cassette           |
| Ret           | 6:118162391-118162471  | 19 | 67::16     | 29::20    | 15::29         | 31::24    | 0.013292 | altend             |
| Dtx2          | 5:136026470-136026607  | 9  | 71::53     | 31::76    | 22::99         | 36::81    | 0.013452 | cassette_multi     |
| Ccdc36        | 9:108412493-108412580  | 6  | 0::76      | 6::16     | 32::32         | 8::21     | 0.013531 | cassette           |
| Zfp710        | 7:80088535-80088632    | 6  | 47::7      | 27::16    | 7::50          | 19::47    | 0.013705 | cassette           |
| Nup107        | 10:117768254-117768323 | 18 | 171::6     | 162::19   | 2::97          | 10::87    | 0.013817 | cassette           |
| Mms22l        | 4:24521098-24521144    | 11 | 20::1      | 23::17    | 1::35          | 7::34     | 0.013955 | cassette           |

|               |                        |    |         |          |         |         |          |                    |
|---------------|------------------------|----|---------|----------|---------|---------|----------|--------------------|
| Mlt4          | 17:13848355-13848375   | 17 | 35::8   | 25::43   | 5::77   | 12::71  | 0.01403  | cassette           |
| Ankrd12       | 17:65982072-65982149   | 13 | 74::4   | 55::16   | 6::60   | 14::50  | 0.014268 | cassette           |
| Polr3g        | 13:81693846-81693890   | 4  | 247::19 | 199::39  | 20::145 | 36::132 | 0.014381 | altend             |
| Atm           | 9:53440747-53440873    | 3  | 102::4  | 83::24   | 4::41   | 12::34  | 0.014517 | cassette           |
| Anapc16       | 10:60002418-60002467   | 8  | 75::60  | 56::102  | 35::129 | 58::123 | 0.014598 | unknown            |
| Dnm3          | 1:162273604-162273649  | 15 | 8::33   | 6::3     | 8::7    | 1::8    | 0.014675 | cassette           |
| Ythdf3        | 3:16203187-16203219    | 5  | 51::72  | 51::135  | 38::145 | 82::164 | 0.014768 | cassette           |
| Uros          | 7:133708924-133709009  | 2  | 6::34   | 32::30   | 8::16   | 22::12  | 0.015587 | alt5               |
| Magea2        | x:155055395-155055483  | 6  | 0::82   | 6::10    | 35::7   | 7::5    | 0.015828 | cassette           |
| Pradc1        | 6:85447688-85447807    | 5  | 22::7   | 14::15   | 9::56   | 21::34  | 0.01586  | alt3               |
| Gtf2a1        | 12:91573299-91573352   | 6  | 73::4   | 60::17   | 9::83   | 18::76  | 0.016125 | cassette           |
| 1600020E01Rik | 6:86541472-86541546    | 5  | 77::0   | 68::10   | 1::43   | 6::35   | 0.016279 | cassette           |
| Plekhhg2      | 7:28364509-28364585    | 18 | 129::9  | 120::37  | 11::76  | 28::81  | 0.01635  | retain_intron      |
| Cbx5          | 15:103215022-103215125 | 3  | 111::54 | 103::22  | 22::124 | 10::142 | 0.016912 | cassette           |
| Ampd2         | 3:108085247-108085399  | 3  | 28::5   | 32::21   | 4::79   | 15::67  | 0.017115 | altstart           |
| Hspbap1       | 16:35792986-35793066   | 3  | 80::0   | 47::7    | 1::25   | 7::23   | 0.017235 | altstart           |
| Gm10256       | y:2865206-2865318      | 6  | 7::0    | 1::81    | 91::13  | 54::1   | 0.017325 | mutually_exclusive |
| Gm10256       | y:2834115-2834153      | 5  | 0::110  | 81::69   | 41::13  | 19::1   | 0.017609 | mutually_exclusive |
| Sh2b1         | 7:126469488-126469570  | 7  | 93::3   | 107::15  | 8::113  | 27::99  | 0.017624 | cassette           |
| Hdac10        | 15:89126630-89126641   | 8  | 7::30   | 16::14   | 4::26   | 13::25  | 0.018004 | alt5               |
| 9330136K24Rik | 17:21535823-21535878   | 13 | 24::0   | 37::20   | 3::5    | 12::4   | 0.018092 | unknown            |
| Ppp1r15a      | 7:45523461-45523739    | 1  | 12::61  | 26::51   | 6::57   | 16::45  | 0.018206 | alt5               |
| Lig3          | 11:82800499-82800653   | 20 | 77::23  | 101::1   | 11::80  | 2::71   | 0.018299 | altend             |
| Wdr83         | 8:85076132-85076217    | 9  | 77::17  | 73::54   | 13::72  | 32::79  | 0.018389 | retain_intron      |
| Commd8        | 5:72164755-72164854    | 4  | 152::69 | 188::44  | 33::66  | 21::78  | 0.019167 | cassette           |
| Acsf3         | 1:78664326-78664406    | 3  | 69::8   | 73::26   | 12::165 | 23::125 | 0.019273 | altend             |
| Adat1         | 8:111990396-111990412  | 3  | 0::20   | 10::4    | 21::26  | 7::26   | 0.019293 | alt3               |
| 2700099C18Rik | 17:94761498-94761604   | 7  | 20::101 | 46::78   | 63::73  | 46::92  | 0.019297 | cassette_multi     |
| Tsc22d2       | 3:58428228-58428299    | 2  | 76::29  | 53::47   | 8::37   | 18::34  | 0.019324 | cassette           |
| Gm21811       | 8:20399303-20399468    | 6  | 44::217 | 349::164 | 18::24  | 14::45  | 0.019406 | cassette           |
| R3hdm2        | 10:127465131-127465182 | 19 | 108::26 | 88::3    | 18::98  | 6::95   | 0.01955  | altend             |
| Cdk2          | 10:128731324-128731412 | 11 | 0::52   | 6::22    | 26::86  | 11::76  | 0.019682 | cassette           |
| Brf1          | 12:112983733-112983849 | 6  | 174::12 | 160::35  | 10::120 | 24::125 | 0.019743 | cassette           |
| Ctns          | 11:73197099-73197252   | 2  | 41::35  | 57::9    | 18::35  | 8::41   | 0.020046 | cassette           |
| Ell           | 8:70539412-70539492    | 2  | 2::7    | 7::0     | 14::69  | 4::61   | 0.020218 | altstart           |
| Bicc1         | 10:70953102-70953182   | 11 | 39::20  | 36::4    | 20::50  | 8::50   | 0.020229 | altend             |
| Ash1l         | 3:89030240-89030352    | 8  | 55::15  | 77::0    | 10::52  | 3::57   | 0.020245 | cassette           |
| Simo1         | 18:67477950-67478061   | 6  | 16::12  | 13::44   | 11::22  | 28::23  | 0.020569 | cassette           |
| Adat1         | 8:111991925-111992005  | 2  | 20::15  | 14::1    | 21::16  | 5::17   | 0.020768 | altend             |
| Kif21a        | 15:90951246-90951374   | 30 | 52::52  | 80::22   | 24::75  | 13::84  | 0.020893 | cassette           |
| 2310045N01Rik | 8:70158814-70158894    | 3  | 29::7   | 13::17   | 8::32   | 15::24  | 0.021344 | altstart           |
| Pbrm1         | 14:31056236-31056280   | 19 | 67::39  | 48::78   | 15::96  | 27::100 | 0.021399 | cassette           |
| Epb4.1        | 4:131962924-131962986  | 18 | 22::70  | 31::43   | 32::99  | 15::94  | 0.021418 | cassette_multi     |
| Gclm          | 3:122261668-122261796  | 6  | 170::11 | 117::44  | 17::28  | 34::26  | 0.021635 | cassette           |

|               |                        |    |         |         |         |        |          |                    |
|---------------|------------------------|----|---------|---------|---------|--------|----------|--------------------|
| Gm21811       | 8:20277872-20277945    | 4  | 0:5     | 16:2    | 31:24   | 101:45 | 0.022089 | mutually_exclusive |
| Hmga1         | 17:27556952-27557066   | 6  | 613:79  | 431:23  | 58:188  | 19:126 | 0.022758 | cassette           |
| Mef2b         | 8:70158814-70158894    | 2  | 29:7    | 12:17   | 8:29    | 15:22  | 0.022869 | altstart           |
| Parp6         | 9:59641741-59641810    | 20 | 57:8    | 61:24   | 8:50    | 22:48  | 0.023319 | cassette           |
| Fam160a2      | 7:105391577-105391667  | 3  | 38:6    | 35:31   | 7:21    | 19:22  | 0.023427 | cassette_multi     |
| Mapk8ip3      | 17:24901529-24901605   | 24 | 37:1    | 33:18   | 2:51    | 11:52  | 0.023449 | retain_intron      |
| B3gnt1        | 11:121651609-121651673 | 5  | 12:27   | 7:71    | 12:41   | 26:45  | 0.023509 | cassette_multi     |
| Dgka          | 10:128731324-128731412 | 10 | 0:52    | 6:22    | 26:29   | 11:27  | 0.023548 | cassette           |
| Recql         | 6:142386862-142386942  | 2  | 50:11   | 50:0    | 8:62    | 1:55   | 0.023641 | altstart           |
| Ptgr2         | 12:84296228-84296356   | 4  | 136:6   | 148:25  | 4:78    | 13:81  | 0.023797 | cassette           |
| Papd4         | 13:93148366-93148473   | 16 | 173:50  | 185:17  | 42:128  | 24:138 | 0.024069 | cassette           |
| Col4a3bp      | 13:96616994-96617071   | 12 | 139:210 | 130:125 | 74:92   | 46:94  | 0.024459 | cassette           |
| Sh3d21        | 4:126152118-126152206  | 12 | 27:9    | 10:16   | 4:21    | 11:14  | 0.024487 | retain_intron      |
| Dnajc5        | 2:181521235-181521287  | 3  | 113:51  | 94:100  | 20:122  | 39:134 | 0.024789 | cassette           |
| Sepp1         | 15:3293853-3293921     | 10 | 7:35    | 0:89    | 16:378  | 42:360 | 0.024928 | cassette_multi     |
| Dcun1d2       | 8:13282534-13282580    | 2  | 12:15   | 20:0    | 7:52    | 2:50   | 0.025468 | cassette           |
| Hmga1         | 17:27556711-27556749   | 5  | 434:101 | 328:25  | 94:223  | 35:159 | 0.02559  | alt5               |
| Gclm          | 3:122261668-122261868  | 6  | 11:166  | 36:114  | 17:168  | 26:110 | 0.026207 | alt3               |
| Utp14a        | x:48273899-48273976    | 12 | 31:125  | 16:178  | 63:69   | 89:62  | 0.026306 | cassette_multi     |
| Kdm5d         | y:927603-927710        | 15 | 9:4     | 6:17    | 12:24   | 6:40   | 0.026364 | alt3               |
| Ube3a         | 7:59240967-59241033    | 2  | 0:8     | 15:1    | 9:86    | 20:94  | 0.026486 | mutually_exclusive |
| Gm26782       | 14:50871751-50871826   | 2  | 32:20   | 48:10   | 15:20   | 7:26   | 0.026619 | cassette           |
| Gba           | 3:89206760-89206812    | 9  | 66:4    | 64:18   | 9:106   | 17:102 | 0.026691 | cassette           |
| BC029214      | 2:25459859-25459915    | 6  | 72:14   | 88:5    | 26:46   | 13:55  | 0.027011 | alt3               |
| Lipo1         | 19:33582093-33582251   | 9  | 18:28   | 0:22    | 28:18   | 30:41  | 0.027277 | alt3               |
| Ppp2r5c       | 12:110574745-110574861 | 18 | 15:0    | 7:6     | 26:114  | 11:102 | 0.027319 | mutually_exclusive |
| Pfce1         | 19:38721920-38721968   | 13 | 51:1    | 35:7    | 6:48    | 16:43  | 0.027376 | alt5               |
| Fbxl2         | 9:113969922-113969977  | 7  | 133:5   | 106:25  | 21:7    | 37:5   | 0.027838 | cassette           |
| Csnk1g3       | 18:53936853-53936948   | 11 | 77:38   | 96:18   | 18:86   | 9:92   | 0.027871 | cassette           |
| Cpsf3l        | 4:155888109-155888184  | 14 | 192:4   | 144:29  | 17:113  | 27:82  | 0.027879 | retain_intron      |
| 4930533K18Rik | 10:70953102-70953182   | 20 | 39:20   | 36:4    | 20:35   | 8:33   | 0.028095 | altstart           |
| Nsl1          | 1:191083637-191083691  | 9  | 12:2    | 15:29   | 3:20    | 17:25  | 0.028108 | retain_intron      |
| Kdelc1        | 1:44101900-44101957    | 2  | 221:305 | 211:175 | 149:331 | 82:287 | 0.028125 | cassette_multi     |
| Lrrc8b        | 5:105415775-105415912  | 2  | 0:26    | 5:17    | 21:27   | 9:32   | 0.028456 | altstart           |
| Cntln         | 4:84893380-84893460    | 4  | 56:3    | 44:12   | 3:45    | 11:47  | 0.028495 | altend             |
| Plekha1       | 7:130909628-130909735  | 13 | 90:11   | 42:22   | 39:90   | 55:74  | 0.02866  | alt5               |
| Disp1         | 1:183173496-183173623  | 4  | 11:8    | 0:10    | 55:28   | 29:28  | 0.028798 | mutually_exclusive |
| Cmb1          | 15:31572188-31572253   | 2  | 20:0    | 14:7    | 1:31    | 7:34   | 0.028975 | altstart           |
| Nup214        | 2:31992910-31992990    | 13 | 31:1    | 12:8    | 2:39    | 7:35   | 0.029025 | altend             |
| Hecw2         | 1:53933217-53933288    | 8  | 6:5     | 0:15    | 7:15    | 14:9   | 0.029073 | alt3               |
| Tank          | 2:61629285-61629372    | 7  | 73:0    | 82:11   | 1:59    | 7:66   | 0.029265 | cassette           |
| AA465934      | 11:83291833-83291967   | 1  | 270:21  | 148:46  | 21:111  | 27:71  | 0.029381 | retain_intron      |
| Gm15559       | 5:110776554-110776607  | 4  | 61:24   | 74:9    | 15:34   | 6:31   | 0.029577 | cassette           |
| 1810058I24Rik | 6:35252782-35253045    | 1  | 507:50  | 525:110 | 39:139  | 73:139 | 0.029669 | alt5               |

|               |                       |    |          |          |         |         |          |                    |
|---------------|-----------------------|----|----------|----------|---------|---------|----------|--------------------|
| Ube2v1        | 2:167629069-167629288 | 2  | 310::21  | 302::79  | 10::171 | 27::168 | 0.029991 | cassette           |
| Evi5          | 5:107810290-107810322 | 19 | 105::31  | 106::62  | 14::119 | 26::126 | 0.030243 | cassette_multi     |
| Ppp1r15a      | 7:45523461-45523739   | 1  | 12::61   | 26::51   | 6::59   | 16::52  | 0.030776 | alt5               |
| Dusp19        | 2:80624208-80624326   | 4  | 52::5    | 33::18   | 48::32  | 42::49  | 0.030919 | alt3               |
| Nup35         | 2:80624208-80624326   | 3  | 52::5    | 33::18   | 48::32  | 42::49  | 0.030919 | alt3               |
| Foxp1         | 6:99399605-99399717   | 5  | 15::1    | 5::16    | 1::36   | 5::28   | 0.031104 | cassette           |
| Chordc1       | 9:18308222-18308284   | 9  | 162::65  | 203::34  | 31::149 | 19::163 | 0.031121 | cassette           |
| Scml2         | x:161228677-161228760 | 27 | 144::478 | 121::279 | 74::223 | 31::187 | 0.031283 | cassette_multi     |
| Kif21a        | 15:90993701-90993742  | 6  | 32::6    | 50::0    | 31::50  | 47::42  | 0.031442 | alt5               |
| Cnot3         | 7:3658745-3658824     | 18 | 171::8   | 199::23  | 5::109  | 20::116 | 0.031599 | altstart           |
| Selo          | 15:89092849-89092907  | 2  | 14::20   | 2::39    | 23::31  | 39::26  | 0.031735 | alt5               |
| Svil          | 18:5104341-5104392    | 37 | 78::11   | 59::0    | 15::47  | 7::48   | 0.031784 | cassette           |
| Kmt2b         | 7:30570468-30570554   | 33 | 100::17  | 106::50  | 13::94  | 32::105 | 0.03181  | retain_intron      |
| Ptprd         | 4:76095520-76095546   | 19 | 27::12   | 26::34   | 3::8    | 12::9   | 0.032238 | cassette           |
| 9130011E15Rik | 19:45835573-45835653  | 25 | 33::10   | 39::1    | 11::44  | 3::39   | 0.032473 | altstart           |
| Cfp           | x:20927181-20927281   | 8  | 1::38    | 15::26   | 6::40   | 12::28  | 0.032493 | alt5               |
| Ano1          | 7:144648575-144648640 | 8  | 17::0    | 27::15   | 1::14   | 6::13   | 0.032736 | cassette           |
| 2610005L07Rik | 8:20272139-20272219   | 20 | 15::159  | 121::182 | 61::27  | 78::56  | 0.032739 | altend             |
| Brd3          | 2:27453400-27453450   | 15 | 144::112 | 147::58  | 49::176 | 28::166 | 0.03286  | cassette           |
| Dis3          | 14:99099119-99099186  | 2  | 38::9    | 37::0    | 6::18   | 1::19   | 0.033235 | cassette           |
| Lgals4        | 7:28840610-28840864   | 7  | 11::25   | 30::7    | 17::23  | 6::25   | 0.033315 | retain_intron      |
| Cyth4         | 15:78604860-78604940  | 6  | 10::5    | 25::0    | 7::13   | 1::12   | 0.033407 | altend             |
| Cit           | 5:115933645-115933655 | 17 | 3::8     | 6::0     | 7::12   | 1::10   | 0.033432 | altstart           |
| Spin2c        | x:153832329-153832435 | 1  | 12::3    | 3::15    | 3::14   | 11::11  | 0.033507 | retain_intron      |
| Ubp1          | 9:113969922-113969977 | 16 | 133::5   | 106::25  | 21::135 | 37::142 | 0.033595 | cassette           |
| Lmbr1         | 5:29274218-29274298   | 12 | 106::4   | 70::10   | 5::33   | 11::23  | 0.033734 | altend             |
| Gm9183        | 17:47680190-47680238  | 15 | 67::0    | 52::10   | 6::77   | 11::71  | 0.033978 | cassette           |
| Mms19         | 19:41945388-41945459  | 29 | 203::33  | 150::71  | 27::148 | 45::127 | 0.033987 | retain_intron      |
| St3gal4       | 9:35126212-35126307   | 8  | 19::201  | 36::175  | 24::204 | 51::200 | 0.034296 | alt5               |
| Kif13b        | 14:64800345-64800446  | 38 | 11::25   | 4::43    | 6::27   | 17::29  | 0.034344 | cassette           |
| 2210015D19Rik | 11:5765509-5765571    | 2  | 16::64   | 4::112   | 25::22  | 46::24  | 0.034524 | cassette_multi     |
| Krml2a        | 9:44843198-44843244   | 8  | 8::9     | 12::0    | 5::29   | 1::28   | 0.03501  | cassette           |
| Kctd9         | 14:67734141-67734290  | 10 | 59::85   | 72::45   | 58::101 | 34::102 | 0.03538  | cassette           |
| Abcc5         | 16:20395541-20395620  | 12 | 27::1    | 37::16   | 4::64   | 12::71  | 0.035405 | cassette           |
| Macf1         | 4:123469723-123469872 | 39 | 16::5    | 7::15    | 2::53   | 9::56   | 0.035462 | cassette           |
| Ogdh          | 11:6316765-6316855    | 6  | 45::59   | 19::59   | 29::127 | 14::127 | 0.035597 | mutually_exclusive |
| Usp33         | 3:152374891-152374915 | 15 | 28::73   | 58::36   | 54::119 | 74::104 | 0.036334 | alt3               |
| BC029214      | 2:25459859-25459915   | 6  | 72::14   | 88::5    | 26::81  | 13::85  | 0.036568 | alt3               |
| Casc3         | 11:98801966-98802027  | 4  | 4::99    | 13::92   | 15::147 | 33::139 | 0.03658  | mutually_exclusive |
| Klhl15        | x:94253940-94254067   | 5  | 38::26   | 13::33   | 19::51  | 31::46  | 0.036668 | altend             |
| Hps1          | 19:42779738-42779914  | 1  | 4::16    | 12::7    | 4::8    | 9::3    | 0.036682 | alt5               |
| Zfp651        | 9:121765945-121765997 | 4  | 67::9    | 66::0    | 10::43  | 5::49   | 0.036733 | cassette           |
| Slc8b1        | 5:120530316-120530396 | 15 | 2::52    | 5::17    | 24::22  | 10::20  | 0.036985 | cassette_multi     |
| Pus1          | 5:110776554-110776607 | 4  | 59::24   | 69::9    | 15::65  | 6::54   | 0.037187 | cassette           |

|               |                       |    |          |          |          |          |          |                |
|---------------|-----------------------|----|----------|----------|----------|----------|----------|----------------|
| Chid1         | 7:141501540-141501595 | 15 | 114::11  | 93::0    | 6::60    | 1::50    | 0.037304 | cassette       |
| Grif1         | 7:16598878-16598934   | 3  | 21::5    | 22::19   | 2::69    | 9::69    | 0.037497 | cassette       |
| Kif1a         | 1:93063632-93063712   | 17 | 28::15   | 46::6    | 13::33   | 6::36    | 0.037611 | altstart       |
| Hsf1          | 15:76499132-76499215  | 10 | 64::46   | 80::16   | 26::89   | 15::90   | 0.037641 | cassette       |
| Gm5918        | 9:72982560-72982626   | 2  | 87::4    | 64::20   | 5::60    | 10::54   | 0.037647 | cassette       |
| Ahdc1         | 4:133060676-133060781 | 7  | 18::18   | 7::26    | 14::20   | 7::29    | 0.037796 | alt3           |
| Nsfl1c        | 2:151502455-151502460 | 6  | 331::701 | 224::784 | 103::414 | 127::357 | 0.03784  | cassette       |
| Nsun5         | 5:135375485-135375555 | 8  | 93::40   | 62::70   | 27::110  | 42::92   | 0.038574 | retain_intron  |
| Ptpkr         | 10:28562107-28562142  | 16 | 34::1    | 41::13   | 1::28    | 6::33    | 0.038706 | cassette       |
| Chd11         | 3:97574047-97574112   | 16 | 98::3    | 77::12   | 8::119   | 13::95   | 0.038867 | cassette       |
| Dleu2         | 14:61632437-61632483  | 6  | 0::23    | 3::5     | 10::6    | 5::8     | 0.039114 | cassette       |
| Emg1          | 6:124705088-124705158 | 4  | 84::85   | 47::169  | 54::178  | 94::172  | 0.039189 | retain_intron  |
| Znr1          | 17:36958296-36958378  | 3  | 203::72  | 191::23  | 59::60   | 28::52   | 0.039576 | retain_intron  |
| Mgat1         | 11:49251550-49251674  | 4  | 28::156  | 9::227   | 92::73   | 125::62  | 0.039816 | cassette       |
| Mageb18       | x:92240410-92240469   | 5  | 9::8     | 20::0    | 4::13    | 1::16    | 0.039895 | cassette       |
| Skiv2l        | 17:34845100-34845168  | 14 | 34::15   | 24::42   | 13::53   | 24::46   | 0.040017 | retain_intron  |
| Pde8b         | 13:95085173-95085261  | 12 | 18::57   | 41::38   | 19::36   | 11::40   | 0.040019 | cassette_multi |
| Gstm6         | 3:108042327-108042411 | 6  | 61::0    | 50::327  | 43::41   | 39::58   | 0.040023 | alt5           |
| Gstm3         | 3:108042327-108042411 | 6  | 61::0    | 50::327  | 43::41   | 39::58   | 0.040023 | alt5           |
| Gm12494       | 3:108042327-108042411 | 6  | 61::0    | 50::327  | 43::41   | 39::58   | 0.040023 | alt5           |
| Mtmr2         | 9:13760418-13760488   | 2  | 57::39   | 44::75   | 17::123  | 33::135  | 0.040306 | cassette       |
| Tcf4          | 18:69678117-69678129  | 26 | 88::72   | 74::31   | 80::114  | 44::106  | 0.040685 | alt5           |
| Sipa1l3       | 7:29331948-29332043   | 21 | 44::16   | 31::31   | 7::43    | 15::41   | 0.040911 | cassette       |
| Pik3cd        | 4:149675912-149676044 | 5  | 5::14    | 9::3     | 12::22   | 4::23    | 0.041425 | altstart       |
| Bfar          | 16:13690258-13690329  | 5  | 60::8    | 82::1    | 15::81   | 7::78    | 0.041444 | cassette       |
| Zkscan2       | 7:123482641-123482684 | 7  | 14::1    | 3::5     | 1::11    | 4::9     | 0.041477 | cassette       |
| Vps33b        | 7:80277644-80277697   | 6  | 50::8    | 42::0    | 7::33    | 1::30    | 0.041516 | cassette       |
| Aff3          | 1:38318524-38318604   | 12 | 30::0    | 24::6    | 1::39    | 6::37    | 0.041553 | altend         |
| Trim33        | 3:103353567-103353617 | 19 | 40::227  | 55::164  | 83::66   | 70::76   | 0.04156  | cassette       |
| Zfp868        | 8:69619314-69619671   | 2  | 128::60  | 108::80  | 74::101  | 49::122  | 0.041645 | unknown        |
| Fam149b       | 14:20367846-20368563  | 8  | 76::38   | 53::66   | 32::67   | 51::60   | 0.041896 | altend         |
| Jmjd1c        | 10:67216983-67217107  | 6  | 14::17   | 8::42    | 14::80   | 26::82   | 0.042151 | cassette       |
| Mthfs         | 9:89211401-89211481   | 4  | 45::73   | 59::52   | 37::24   | 17::22   | 0.042376 | altstart       |
| Zmynd8        | 2:165807519-165807675 | 25 | 16::17   | 6::24    | 14::29   | 5::33    | 0.042527 | alt5           |
| Gnb1l         | 16:18540435-18540575  | 6  | 9::105   | 17::59   | 47::13   | 20::12   | 0.042563 | cassette_multi |
| Snx13         | 12:35119733-35119766  | 18 | 33::109  | 19::134  | 34::70   | 21::79   | 0.04263  | alt3           |
| Myo9b         | 8:71348901-71348935   | 23 | 27::80   | 47::33   | 51::83   | 29::85   | 0.042701 | retain_intron  |
| 2610020H08Rik | 7:119794502-119794593 | 1  | 23::0    | 50::9    | 1::32    | 11::36   | 0.042873 | alt5           |
| Erc1          | 6:119694284-119694364 | 19 | 45::0    | 29::5    | 5::31    | 11::26   | 0.042939 | altend         |
| Exoc1         | 5:76557819-76557863   | 12 | 151::143 | 118::73  | 59::144  | 37::144  | 0.043101 | cassette       |
| Csnk1g3       | 18:53948645-53948668  | 13 | 43::221  | 64::180  | 68::86   | 52::92   | 0.043156 | cassette       |
| Arrb2         | 11:70435516-70435542  | 3  | 22::209  | 37::130  | 50::212  | 54::150  | 0.043416 | alt3           |
| Bcl2l1        | 2:128127575-128127812 | 2  | 11::16   | 23::11   | 14::23   | 3::21    | 0.043479 | altstart       |
| Gpatch11      | 17:78838250-78838383  | 4  | 163::7   | 135::17  | 5::50    | 12::44   | 0.04392  | cassette       |



|               |                        |    |          |          |          |          |          |                    |
|---------------|------------------------|----|----------|----------|----------|----------|----------|--------------------|
| Synj1         | 16:90947015-90947053   | 29 | 10::13   | 11::1    | 6::15    | 2::16    | 0.044223 | cassette_multi     |
| Zpbp          | 11:11429063-11429126   | 3  | 6::19    | 5::1     | 9::6     | 1::4     | 0.044245 | cassette           |
| 2610005L07Rik | 8:20274162-20274242    | 18 | 32::233  | 121::374 | 43::27   | 54::56   | 0.044309 | altend             |
| Brf1          | 12:112987137-112987192 | 4  | 120::2   | 77::21   | 33::120  | 51::125  | 0.044591 | cassette           |
| Adarb1        | 10:77312348-77312378   | 10 | 5::23    | 10::3    | 9::25    | 9::9     | 0.044617 | alt5               |
| 1700007J10Rik | 11:59737412-59737582   | 21 | 1::8     | 6::3     | 14::145  | 30::138  | 0.044668 | mutually_exclusive |
| Rapgef4       | 2:72172786-72172866    | 9  | 1::5     | 7::0     | 6::9     | 2::12    | 0.044758 | altstart           |
| Rffl          | 11:82811028-82811111   | 8  | 31::86   | 41::41   | 42::67   | 21::54   | 0.044777 | cassette           |
| Ubl7          | 9:57911007-57911059    | 1  | 1::96    | 10::75   | 51::6    | 40::10   | 0.044949 | alt5               |
| Abi1          | 2:22963214-22963228    | 5  | 115::263 | 74::326  | 73::213  | 93::196  | 0.045048 | cassette           |
| Cmc1          | 9:118068674-118068828  | 5  | 260::14  | 221::29  | 17::76   | 27::67   | 0.045386 | cassette           |
| Kifc3         | 8:95100647-95100673    | 23 | 7::51    | 0::67    | 18::29   | 25::25   | 0.045492 | cassette           |
| Ehmt2         | 17:34905610-34905711   | 10 | 181::931 | 372::610 | 361::404 | 232::388 | 0.045702 | cassette           |
| Cpsf3l        | 4:155888326-155888396  | 15 | 109::12  | 60::32   | 14::108  | 21::79   | 0.045749 | retain_intron      |
| Tbc1d1        | 5:64283967-64284125    | 14 | 41::2    | 36::17   | 3::43    | 9::40    | 0.046223 | cassette_multi     |
| Gm20695       | 16:3907999-3908134     | 9  | 25::0    | 19::5    | 1::47    | 7::45    | 0.046378 | cassette           |
| Tulp2         | 7:45523461-45523632    | 29 | 60::12   | 51::26   | 9::179   | 24::193  | 0.046397 | altend             |
| Trappc13      | 13:104152165-104152182 | 9  | 78::98   | 91::53   | 25::92   | 15::83   | 0.047398 | cassette           |
| Rsbnl1        | 5:20908212-20908244    | 4  | 2::51    | 14::44   | 48::36   | 51::61   | 0.047487 | alt3               |
| Rcctb1        | 14:59209743-59209810   | 4  | 48::3    | 39::17   | 12::98   | 21::103  | 0.047494 | cassette           |
| E2f3          | 13:29984128-29984219   | 2  | 15::3    | 3::8     | 2::30    | 7::30    | 0.047706 | altstart           |
| Gm20517       | 17:47680190-47680238   | 12 | 67::0    | 52::10   | 6::38    | 11::38   | 0.04775  | cassette           |
| Gm2694        | 8:87513809-87513896    | 3  | 76::39   | 65::15   | 18::39   | 6::31    | 0.047983 | cassette           |
| Sh3bgr        | 16:96205719-96205939   | 2  | 96::75   | 91::123  | 23::129  | 46::133  | 0.048021 | altstart           |
| Cblb          | 16:52186349-52186480   | 18 | 15::16   | 37::3    | 12::44   | 5::45    | 0.048189 | cassette           |
| Dpysl4        | 7:139088365-139088398  | 2  | 127::5   | 142::29  | 21::112  | 43::132  | 0.048259 | altstart           |
| Myzap         | 9:71586172-71586216    | 2  | 83::11   | 95::28   | 3::42    | 9::36    | 0.048472 | cassette           |
| Pibf1         | 14:99099119-99099186   | 2  | 38::9    | 37::0    | 6::39    | 1::32    | 0.048497 | cassette           |
| Mirg          | 12:109743357-109743418 | 15 | 0::11    | 2::0     | 6::7     | 1::6     | 0.048504 | cassette           |
| Svil          | 18:5057275-5057439     | 15 | 33::1    | 28::8    | 1::48    | 7::49    | 0.048558 | cassette           |
| Zfp382        | 7:30130056-30130143    | 3  | 8::0     | 8::17    | 1::8     | 7::10    | 0.048584 | cassette           |
| Nudt6         | 3:37415651-37415692    | 4  | 62::3    | 34::11   | 2::26    | 6::29    | 0.048863 | cassette           |
| Supt16        | 14:52212719-52212743   | 25 | 52::32   | 79::24   | 40::97   | 27::120  | 0.048926 | alt3               |
| Gm20535       | 12:21256475-21256609   | 31 | 3::11    | 6::3     | 10::86   | 2::79    | 0.048955 | cassette           |
| Tmem68        | 4:3562020-3562146      | 9  | 22::13   | 30::1    | 7::40    | 2::42    | 0.048976 | cassette           |
| Ggta1         | 2:35414219-35414284    | 9  | 4::29    | 8::13    | 14::18   | 7::22    | 0.049202 | cassette           |
| Zfp652        | 11:95825195-95825293   | 10 | 43::12   | 31::0    | 7::27    | 1::22    | 0.04931  | cassette           |
| Cdc14b        | 13:64201332-64201448   | 16 | 32::25   | 17::30   | 58::66   | 38::77   | 0.049341 | mutually_exclusive |
| Rnf111        | 9:70429655-70429679    | 15 | 81::20   | 57::32   | 33::83   | 42::65   | 0.049559 | alt3               |
| Ndufaf5       | 2:140199365-140199460  | 10 | 97::27   | 84::52   | 17::59   | 26::54   | 0.049738 | cassette           |
| Fam76a        | 4:132909626-132909754  | 8  | 128::2   | 128::20  | 7::120   | 16::123  | 0.04993  | cassette           |
| Map2k4        | 11:65781353-65781433   | 2  | 95::12   | 81::34   | 25::148  | 40::151  | 0.049976 | altend             |

Supplementary Table 5. Primer sequence used for real-time RT-PCR assay

| Gene                    | Forward (5'→3')             | Reverse (5'→3')              |
|-------------------------|-----------------------------|------------------------------|
| <i>Bcas2</i>            | TCGCTGCTCGACAACCGATTGAA     | AGCTGCATGTTCTTCGCTGCCA       |
| <i>Gapdh</i>            | CCCCAATGTGTCCGTCGTG         | TGCCTGCTTCACCACCTTCT         |
| <i>Oct4</i>             | GAAGCAGAAGAGGATCACCTTG      | TTCTTAAGGCTGAGCTGCAAG        |
| <i>Sox2</i>             | GGCAGCTACAGCATGATGCAGGAGC   | CTGGTCATGGAGTTGTACTGCAGG     |
| <i>c-Kit</i>            | TCATCGAGTGTGATGGGAAA        | GGTGACTTGTTCAGGCACA          |
| <i>Hprt</i>             | GCCAGTAAAATTAGCAGTGTTCT     | ATAGGCTCATAGTGCAAATCAAAG     |
| <i>Nanos2</i>           | GGAATAAGAGGAAGGTACAGGAACTA  | TATATTGGATGGGTAGAAGAGAGAGAA  |
| <i>Stra8</i>            | CTGTTGCCGGACCTCATGG         | TCACTTCATGTGCAGAGATGATG      |
| <i>Dmc1</i>             | AGCCACCTTCGCAATAACC         | CCACTTCTCCAGCCCCTAAT         |
| <i>Rec8</i>             | CTACCTAGCTTGCTTCTCCCA       | GCCTCTAAAAGGTGTGCAATCTG      |
| <i>Mvh</i>              | CTAGGAAGACCAATAGTGAATCTGAC  | TCCAGAACCTGTACTACTTCTTCATT   |
| <i>Sycp1</i>            | AAGTTTGATTCTAAAACAACCTCTTCA | ACTCTTTTGTAGTTGGTGTCTTCACTGT |
| <i>Sycp3</i>            | AGAAATGTATACCAAAGCTTCTTTCAA | TTAGATAGTTTTCTCCTTGTTCCTCA   |
| <i>Sohlh2</i>           | TCTCAGCCACATCACAGAGG        | GGGGACGCGAGTCTTATACA         |
| <i>Sohlh1</i>           | GGGCAATGAGGATTACAGA         | CACAGGAGCTGTGCAGAGAG         |
| <i>Tuba3a</i> -pre-mRNA | CCACTACACCATCGGCAAAG        | CCAGACAGCCACCATCTAAAGC       |
| <i>Tuba3a</i> -mRNA     | GGATGTGGTTCCCAAAGATGT       | CACAGTGGGAGGCTGGTAGTT        |
| <i>Tuba3b</i> -pre-mRNA | AGCCAACAATTATGCCAGAGG       | CCTTGACCGGGACAACCAT          |
| <i>Tuba3b</i> -mRNA     | CACAGGCCGATCTGTGCA          | CCACTGAAAGCCGCTCCAT          |
| <i>Tubb4b</i> -pre-mRNA | GGACTCGGTGCGTTCAGG          | GCTTTCGGCCAAGGGATT           |
| <i>Tubb4b</i> -mRNA     | AGCTGTTCCGCAGTCGCC          | GGTCGCTATCTCCGTGGTAAG        |
| <i>Dazl</i>             | GGATGAAACCGAAATCAGGA        | ATAGCCCTTCGACACACCAG         |
| <i>Dazl</i> -FL         | TCCACCACAGTTCAGAGTG         | AACATAACTCCTCTGCTCTCCA       |
| <i>Dazl</i> -Δ 8        | TCCACCACAGTTCAGAGTG         | CAGTTGTATAAGCCTGGTAG         |
| <i>Dazl</i> +7          | TGTGCAGGCCCGTGTAT           | GGAACCCTGGGAAGAAGA           |
| <i>Hmga1</i>            | GAGCCCAGTGAAGTCCAAC         | CCTTGGTTTCTCCCTGGAG          |
| <i>Hmga1</i> -E1        | CCCCAGCTCGGATGTGAC          | GCAAATGCGGATCTGAAACC         |
| <i>Ehmt2</i>            | CATCAATGCCGTAGATAAGCAA      | GTGGAGCCATCCTCTTCCTT         |
| <i>Ehmt2</i> -Δ10-F     | AGCCAAGAGGGGTCTCCAA         | CTCGCTGATGCGGTCAATC          |
| <i>Ehmt2</i> -FL-F      | AGCCAAGAGGAGTGAATGGTGT      | CCAGTGAAGACGTGTCATTGGA       |

**Supplementary Table 6. Primer sequence used for RT-PCR assay**

| <b>Gene</b>  | <b>Gene Forward (5'→3')</b> | <b>Reverse (5'→3')</b> |
|--------------|-----------------------------|------------------------|
| <i>Dazl</i>  | TCCTCCTTATCCAAGTTCACCA      | TCAGCTCCTGGATCAACTTCAC |
| <i>Ehmt2</i> | AGACAGCCCGTGGGTGAA          | GCGGTCAATCTTGGGAGC     |
| <i>Hmga1</i> | CCCCAGCTCGGATGTGAC          | GCAAATGCGGATCTGAAACC   |
| <i>Gapdh</i> | ACCACAGTCCATGCCATCAC        | TCCACCACCCTGTTGCTGTA   |
